# Supplementary material
Source: PubMed Central journal article supplement (PMC2807478)
Supplement: NIHMS154423-supplement-1.pdf [file NIHMS154423-supplement-1.pdf]

**Supplemental Table 1. Summary of Association Results in the GoKinD Collection for SNPs in Linkage Disequilibrium ( $r^2 > 0.80$ ) with the Leading SNPs on Chromosomes 1 (rs6671557) and 13 (rs1411766).**

| SNP                                          | Position (basepair) | Location        | Linkage Disequilibrium with Leading SNP ( $r^2$ ) | Risk allele (non-risk allele) | Risk allele frequencies, $P$ -values, and ORs for the GoKinD collection |                   |                                        |                         |
|----------------------------------------------|---------------------|-----------------|---------------------------------------------------|-------------------------------|-------------------------------------------------------------------------|-------------------|----------------------------------------|-------------------------|
|                                              |                     |                 |                                                   |                               | Controls ( $n=885$ )                                                    | Cases ( $n=820$ ) | $P$ -value                             | OR (95% CI)             |
| Chromosome 1: rs6671557, <i>NEGR1</i> region |                     |                 |                                                   |                               |                                                                         |                   |                                        |                         |
| rs12030511                                   | 71,881,386          | Intron 4        | 0.92                                              | A(C)                          | 0.04                                                                    | 0.06              | $5.0 \times 10^{-4}$                   | 1.77 (1.28-2.45)        |
| rs12031842                                   | 71,907,260          | Intron 4        | 0.92                                              | A(G)                          | 0.04                                                                    | 0.06              | $5.0 \times 10^{-4}$                   | 1.77 (1.28-2.45)        |
| rs12031657                                   | 71,917,344          | Intron 4        | 0.92                                              | C(G)                          | 0.04                                                                    | 0.06              | $3.7 \times 10^{-4}$                   | 1.77 (1.28-2.45)        |
| rs12041607                                   | 71,928,607          | Intron 4        | 0.94                                              | C(T)                          | 0.04                                                                    | 0.06              | $1.8 \times 10^{-4}$                   | 1.79 (1.30-2.48)        |
| rs7531512                                    | 71,939,625          | Intron 3        | 0.96                                              | T(C)                          | 0.03                                                                    | 0.06              | $1.3 \times 10^{-4}$                   | 1.86 (1.34-2.58)        |
| rs12037107                                   | 71,978,890          | Intron 3        | 0.97                                              | A(T)                          | 0.03                                                                    | 0.06              | $1.3 \times 10^{-4}$                   | 1.88 (1.35-2.60)        |
| rs12030035                                   | 71,980,671          | Intron 3        | 0.97                                              | T(G)                          | 0.03                                                                    | 0.06              | $1.3 \times 10^{-4}$                   | 1.88 (1.35-2.60)        |
| rs17091704                                   | 71,981,505          | Intron 3        | 0.97                                              | C(T)                          | 0.03                                                                    | 0.06              | $1.3 \times 10^{-4}$                   | 1.88 (1.35-2.60)        |
| rs17091710                                   | 71,984,531          | Intron 3        | 0.97                                              | A(G)                          | 0.03                                                                    | 0.06              | $1.3 \times 10^{-4}$                   | 1.88 (1.35-2.60)        |
| rs12043796                                   | 71,987,617          | Intron 3        | 0.97                                              | T(A)                          | 0.03                                                                    | 0.06              | $1.3 \times 10^{-4}$                   | 1.88 (1.35-2.60)        |
| rs12023733                                   | 71,988,582          | Intron 3        | 0.97                                              | A(C)                          | 0.03                                                                    | 0.06              | $5.0 \times 10^{-4}$                   | 1.88 (1.35-2.60)        |
| <b>rs6671557</b>                             | <b>71,992,909</b>   | <b>Intron 3</b> | <b>---</b>                                        | <b>A(C)</b>                   | <b>0.03</b>                                                             | <b>0.07</b>       | <b><math>4.9 \times 10^{-5}</math></b> | <b>1.98 (1.43-2.43)</b> |

|             |            |          |      |      |      |      |                       |                     |
|-------------|------------|----------|------|------|------|------|-----------------------|---------------------|
| rs6697370   | 72,011,279 | Intron 3 | 0.92 | A(C) | 0.04 | 0.07 | 3.4 x10 <sup>-4</sup> | 1.74<br>(1.28-2.36) |
| rs12048869  | 72,017,041 | Intron 2 | 0.95 | C(T) | 0.03 | 0.06 | 1.6 x10 <sup>-4</sup> | 1.87<br>(1.34-2.60) |
| rs7528030   | 72,019,865 | Intron 2 | 0.95 | G(A) | 0.03 | 0.06 | 1.6 x10 <sup>-4</sup> | 1.87<br>(1.34-2.60) |
| rs12024388* | 72,026,165 | Intron 2 | 0.95 | C(T) | 0.03 | 0.06 | 1.6 x10 <sup>-4</sup> | 1.87<br>(1.34-2.60) |
| rs11584866  | 72,028,565 | Intron 2 | 0.95 | A(C) | 0.03 | 0.06 | 1.6 x10 <sup>-4</sup> | 1.87<br>(1.34-2.60) |
| rs12040327  | 72,036,627 | Intron 2 | 0.95 | T(C) | 0.03 | 0.06 | 1.6 x10 <sup>-4</sup> | 1.87<br>(1.34-2.60) |
| rs11578097  | 72,041,472 | Intron 2 | 0.95 | C(G) | 0.03 | 0.06 | 1.6 x10 <sup>-4</sup> | 1.87<br>(1.34-2.60) |
| rs11588321  | 72,046,203 | Intron 2 | 0.93 | T(C) | 0.03 | 0.06 | 3.9 x10 <sup>-4</sup> | 1.81<br>(1.30-2.52) |
| rs6701156   | 72,048,147 | Intron 2 | 0.93 | C(T) | 0.03 | 0.06 | 3.9 x10 <sup>-4</sup> | 1.81<br>(1.30-2.52) |
| rs12078969  | 72,053,759 | Intron 2 | 0.91 | C(T) | 0.03 | 0.06 | 5.4 x10 <sup>-4</sup> | 1.79<br>(1.28-2.50) |

Chromosome 13: rs1411766, *MYO16-IRS2* region

|                   |                    |                   |            |             |             |             |                            |                                   |
|-------------------|--------------------|-------------------|------------|-------------|-------------|-------------|----------------------------|-----------------------------------|
| <b>rs1411766*</b> | <b>109,050,161</b> | <b>Intergenic</b> | <b>---</b> | <b>A(G)</b> | <b>0.32</b> | <b>0.39</b> | <b>1.8x10<sup>-6</sup></b> | <b>1.41</b><br><b>(1.23-1.63)</b> |
| rs17412858*       | 109,050,609        | Intergenic        | 0.99       | G(A)        | 0.32        | 0.39        | 2.1 x10 <sup>-6</sup>      | 1.41<br>(1.22-1.62)               |
| rs9555618         | 109,051,201        | Intergenic        | 0.99       | A(G)        | 0.32        | 0.39        | 2.1 x10 <sup>-6</sup>      | 1.41<br>(1.22-1.62)               |
| rs9515085*        | 109,056,783        | Intergenic        | 0.91       | G(T)        | 0.34        | 0.41        | 2.2 x10 <sup>-5</sup>      | 1.35<br>(1.18-1.56)               |
| rs329918          | 109,058,779        | Intergenic        | 0.86       | G(C)        | 0.33        | 0.40        | 5.0 x10 <sup>-5</sup>      | 1.34<br>(1.16-1.54)               |
| rs1547241         | 109,071,606        | Intergenic        | 0.82       | C(G)        | 0.30        | 0.37        | 2.7 x10 <sup>-5</sup>      | 1.36<br>(1.18-1.57)               |

Genotyped and imputed SNPs in linkage disequilibrium with the leading SNPs on chromosomes 1 (rs6671557) and 13 (rs1411766). *P*-values and odds ratios (ORs) for case and control comparisons of the GoKinD collection were calculated using stratified additive tests of association using the Cochran-Mantel-Haenszel method, adjusting for both gender and JDC/GWU strata. SNP positions and locations are in reference to NCBI Build 36.1.

\* SNPs genotyped on the Affymetrix 5.0 500K SNP Array.
